# Supplementary material
Source: PubMed Central journal article supplement (PMC9174177)
Supplement: mmc1.pdf [file mmc1.pdf]

**Supplemental information**

**SARS-CoV-2-specific T cell memory with common  
TCR $\alpha\beta$  motifs is established in unvaccinated  
children who seroconvert after infection**

**Louise C. Rowntree, Thi H.O. Nguyen, Lukasz Kedzierski, Melanie R. Neeland, Jan Petersen, Jeremy Chase Crawford, Lilith F. Allen, E. Bridie Clemens, Brendon Chua, Hayley A. McQuilten, Anastasia A. Minervina, Mikhail V. Pogorelyy, Priyanka Chaurasia, Hyon-Xhi Tan, Adam K. Wheatley, Xiaoxiao Jia, Fatima Amanat, Florian Krammer, E. Kaitlynn Allen, Sabrina Sonda, Katie L. Flanagan, Jaycee Jumarang, Pia S. Pannaraj, Paul V. Licciardi, Stephen J. Kent, Katherine A. Bond, Deborah A. Williamson, Jamie Rossjohn, Paul G. Thomas, Shidan Tosif, Nigel W. Crawford, Carolien E. van de Sandt, and Katherine Kedzierska**

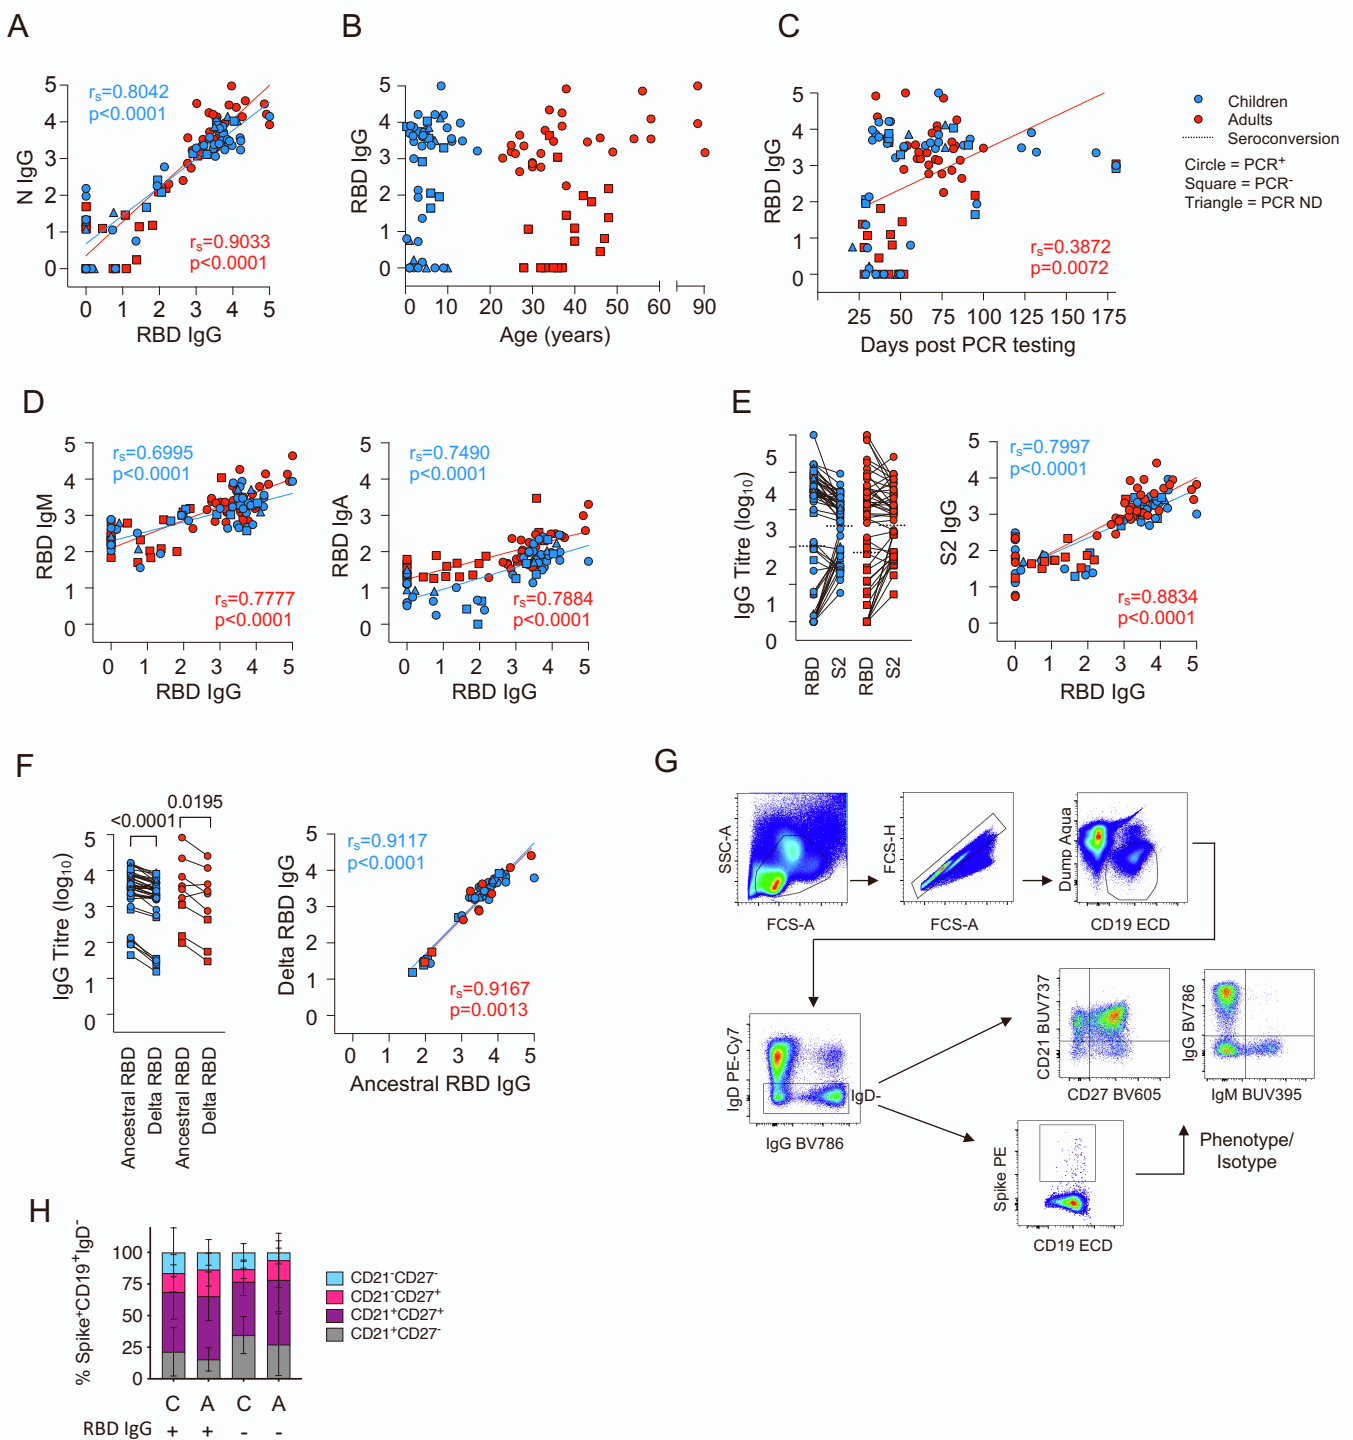

**Figure S1. SARS-CoV-2-specific antibody and B cell response, refer to Figure 1.** (A) Correlation between RBD IgG and N IgG titres for SARS-CoV-2 exposed children and adults. (B-C) Correlation between RBD IgG titres and (B) age or (C) days post PCR testing. (D) Correlation of RBD IgG titres against RBD IgM (left) and IgA (right). (E) Paired analysis (left) and correlation (right) of RBD- and S2-specific IgG antibody titres in SARS-CoV-2 exposed children and adults. Dashed lines indicate seroconversion cut-off based on healthy children and adult titres (mean plus two standard deviations). (F) Paired analysis (left) and correlation (right) of ancestral and delta RBD-specific IgG antibody titres. Statistical significance was determined using Wilcoxon matched-pairs signed rank test (E-F) and Spearman's rank correlation (A-F). (G) Gating strategy for Spike-specific B cells; gated on FSC/SSC, singlets, live cells excluding T cell/NK cell/monocyte lineage markers, expression of CD19, then gated as IgD<sup>-</sup>, IgM<sup>+/-</sup>, IgG<sup>+/-</sup> and binding to Spike probe, with expression of CD21/CD27. (H) Memory phenotypes of Spike<sup>+</sup> B cells from RBD IgG positive and negative individuals; data are shown as mean with SD. Statistical significance was determined with Sidak's multiple comparisons test.

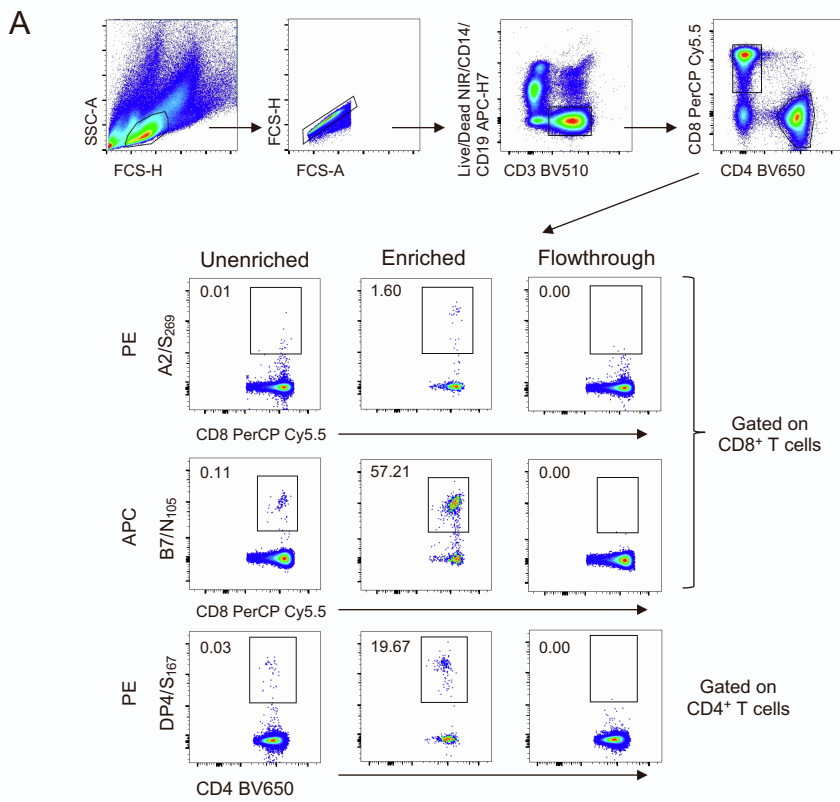

**B**

| HLA            | Region                     | Sequence tetramer | B.1.1.7 (Alpha) |      | B.1.351 (Beta) |       | P.1 (Gamma) |       | B.1.617.2 (Delta) |       | B.1.1.529 (Omicron) |       |
|----------------|----------------------------|-------------------|-----------------|------|----------------|-------|-------------|-------|-------------------|-------|---------------------|-------|
|                |                            |                   | Sequence        | %    | Sequence       | %     | Sequence    | %     | Sequence          | %     | Sequence            | %     |
| HLA-A*01:01    | ORF1a <sub>1637-1646</sub> | TTDPSFLGRY        | -----           | 99.9 | -----          | 99.9  | -----       | >99.9 | -----             | 90.9  | -----               | >99.9 |
|                |                            |                   | ---L-----       | 0.1  | ---L-----      | 0.1   | ---L-----   | <0.1  | ---L-----         | 9.1   | ---L-----           | <0.1  |
| HLA-A*02:01    | S <sub>289-277</sub>       | YLQPRTFLL         | -----           | 100  | -----          | 100   | -----       | 100   | -----             | 100   | -----               | 100   |
| HLA-A*03:01    | N <sub>361-369</sub>       | KTFPPTEPK         | -----           | 99.9 | -----          | 92    | -----       | 99.9  | -----             | 99.6  | -----               | 99.9  |
|                |                            |                   | -I-----         | 0.1  | -I-----        | 8     | -I-----     | 0.1   | -I-----           | 0.4   | -I-----             | 0.1   |
| HLA-A*24:02    | S <sub>1208-1216</sub>     | QYIKWPWYI         | -----           | 100  | -----          | 100   | -----       | 100   | -----             | 100   | -----               | 100   |
| HLA-B*07:02    | N <sub>105-113</sub>       | SPRWYFYLL         | -----           | 100  | -----          | 100   | -----       | 100   | -----             | 100   | -----               | 100   |
| HLA-B*40:01    | N <sub>322-331</sub>       | MEVTPSGTWL        | -----           | 99.9 | -----          | 99.9  | -----       | 99.8  | -----             | 98.2  | -----               | 100   |
|                |                            |                   | ---L---         | 0.1  | ---L---        | 0.1   | ---L---     | 0.2   | ---L---           | 1.8   | ---L---             | 0.1   |
| HLA-DPB1*04:01 | S <sub>167-180</sub>       | TFEYVSQPFLMDLE    | -----           | 99.5 | -----          | >99.9 | -----       | >99.9 | -----             | >99.9 | -----               | 100   |
|                |                            |                   | -----H--        | 0.5  | -----H--       | <0.1  | -----H--    | <0.1  | -----H--          | <0.1  | -----H--            | <0.1  |

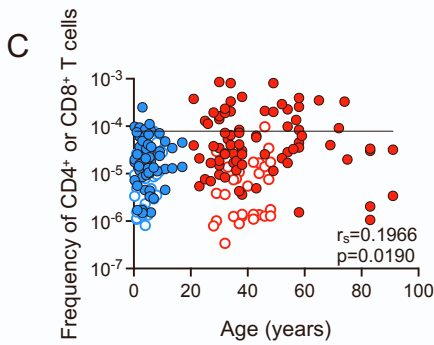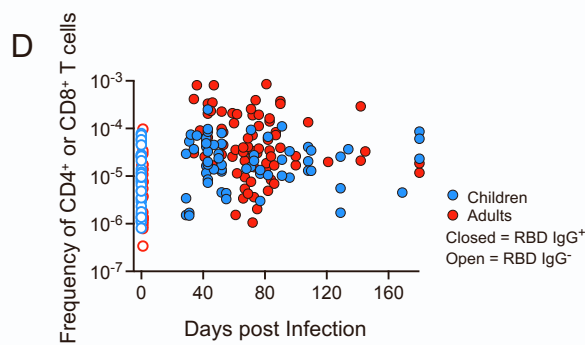

**Figure S2. SARS-CoV-2-specific T cell frequencies and peptide conservation analysis, refer to Figure 2.** (A) Gating strategy of enriched tetramer<sup>+</sup> CD4<sup>+</sup> and CD8<sup>+</sup> T cells and phenotype populations. (B) Amino acid sequence identity of the viral peptides of the SARS-CoV-2 tetramers across the different variants of concern (VOC). (C-D) Correlation of SARS-CoV-2 exposed individuals' frequency of tetramer<sup>+</sup> T cells against (C) age and (D) days post infection. Statistical significance was determined using Spearman's rank correlation.

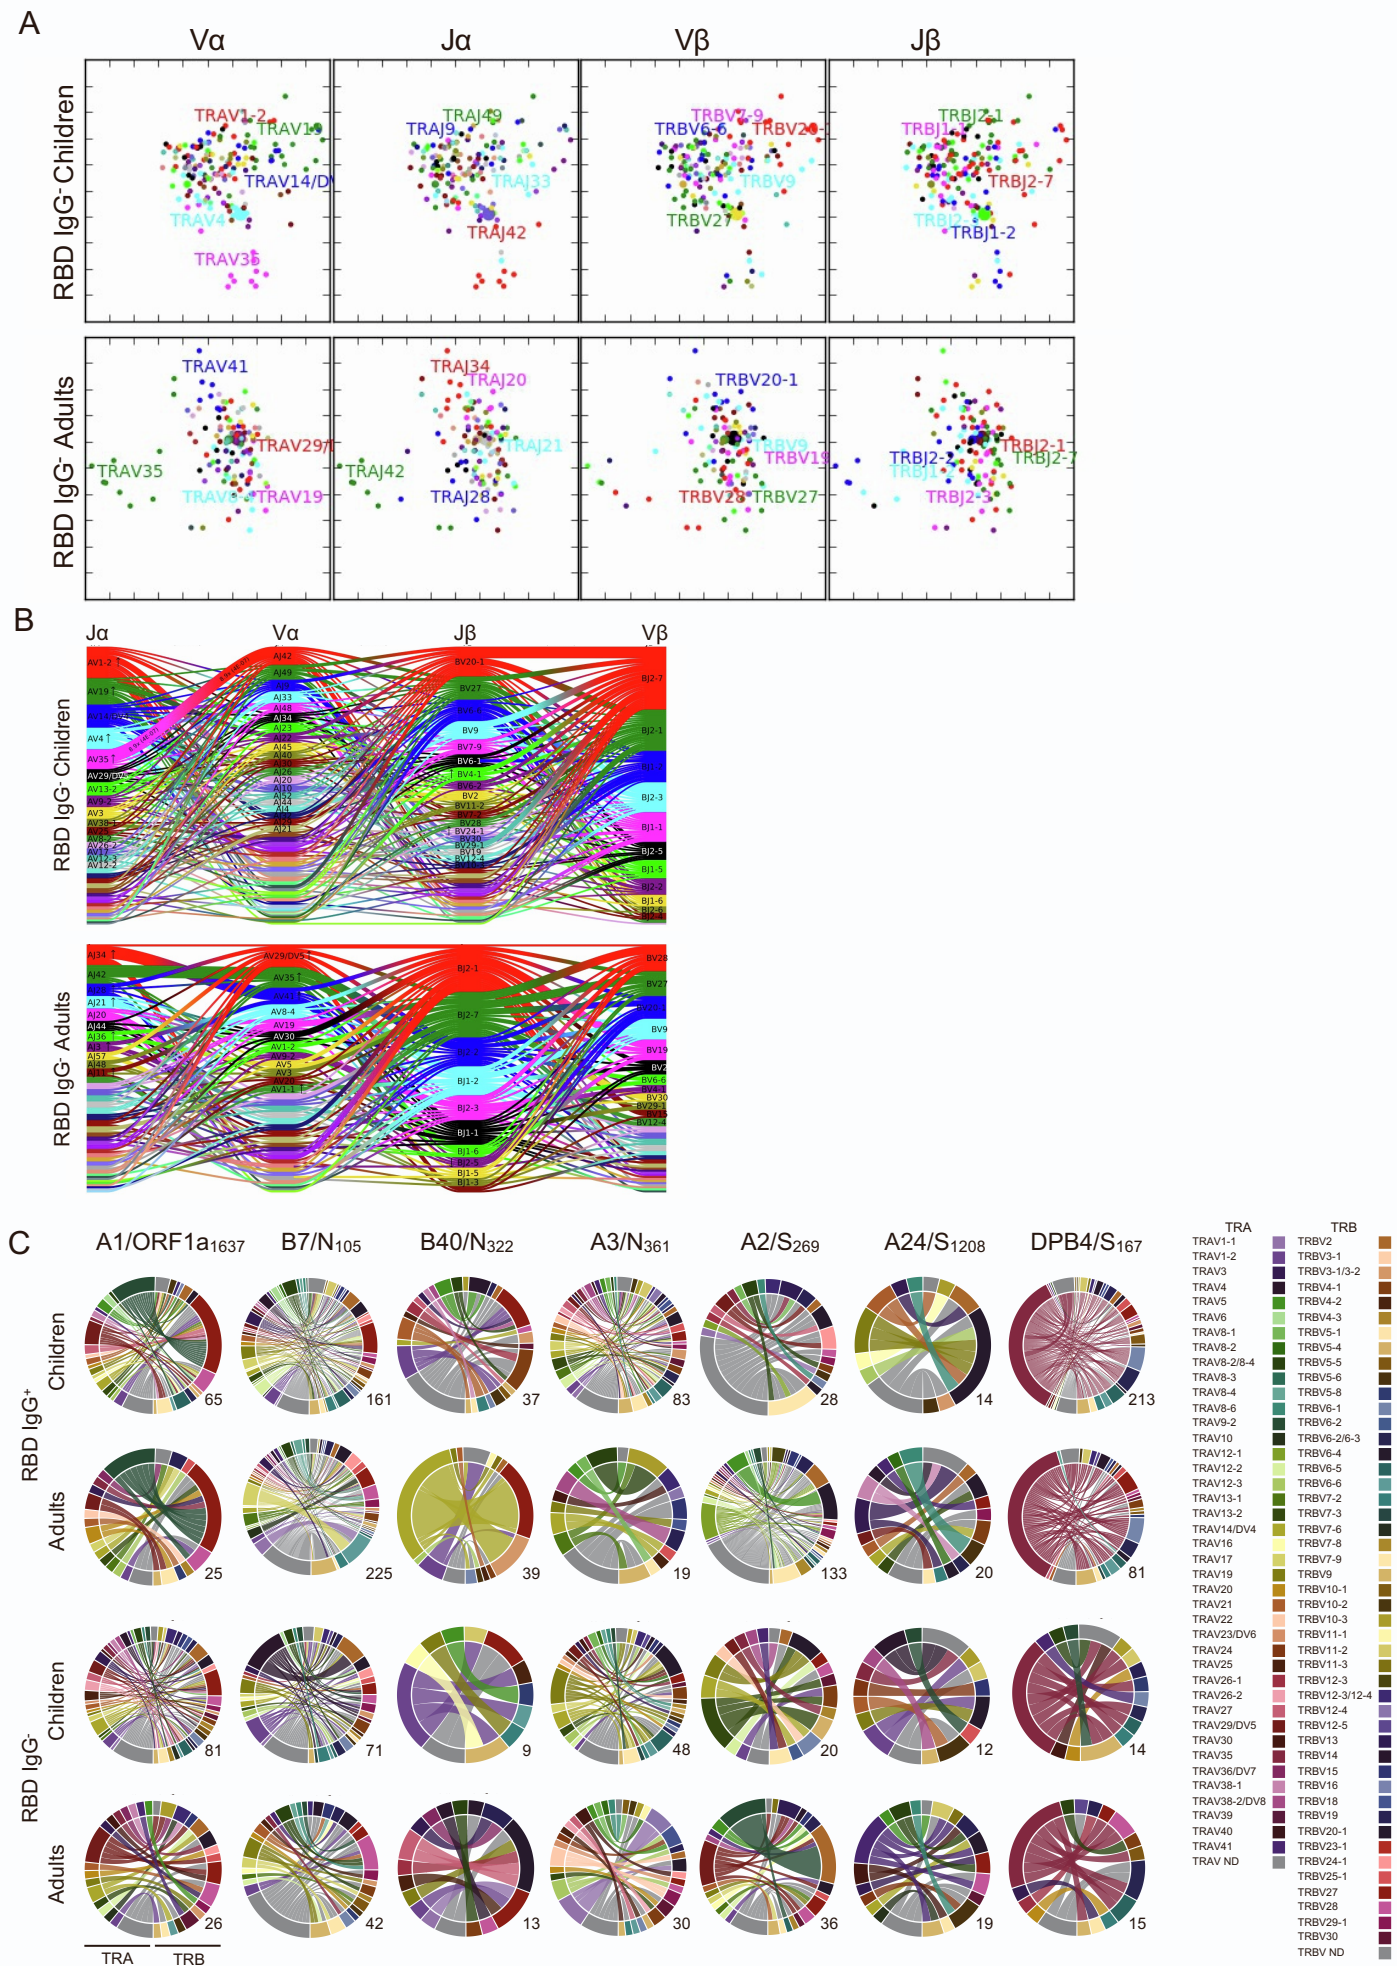

**Figure S3. Diverse SARS-CoV-2-specific TCRab repertoires in RBD IgG<sup>-</sup> children and adults, refer to Figure 5.** (A) Kernel PCA projections of pooled SARS-CoV-2-specific TCRs depicting Va, Ja, Vb, and Jb usage for RBD IgG<sup>-</sup> children and adults. Encoding clone size indicated by symbol size. (B) V and J gene segment usage and covariation in SARS-CoV-2-specific responses in RBD IgG<sup>-</sup> children and adults. (C) CIRCOS plots of TRAV and TRBV clonotype pairings in children and adults; left arch and segment color indicate TRAV usage, and right outer arch color depicts TRBV usage. Segments shown by the same color represent TCRab clonotypes with the same V segment usage but different CDR3 sequences. The number of sequences considered for each CIRCOS plot is shown at the bottom right.



### A1/ORF1<sub>1637</sub>

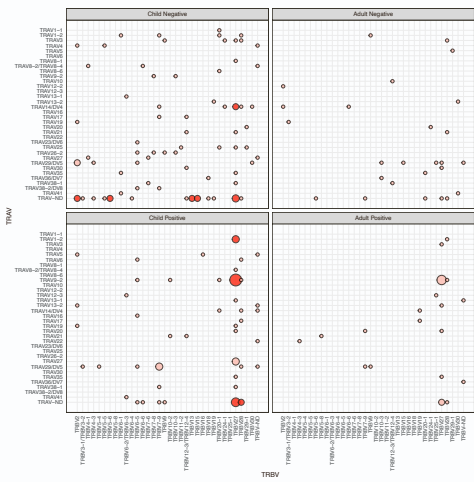

### B7/N<sub>105</sub>

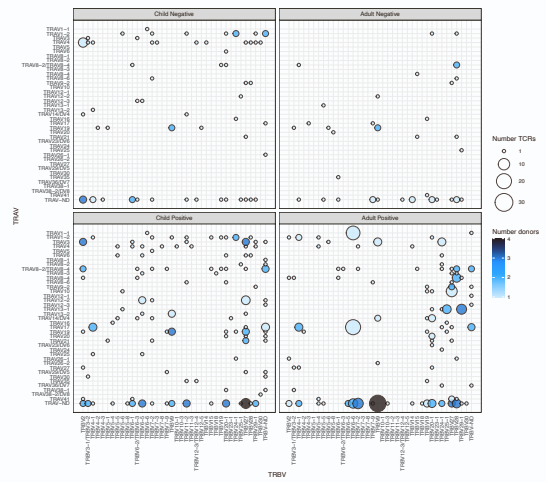

### B40/N<sub>322</sub>

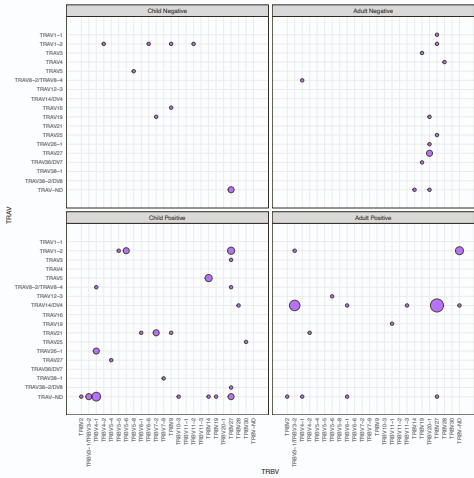

### A3/N<sub>361</sub>

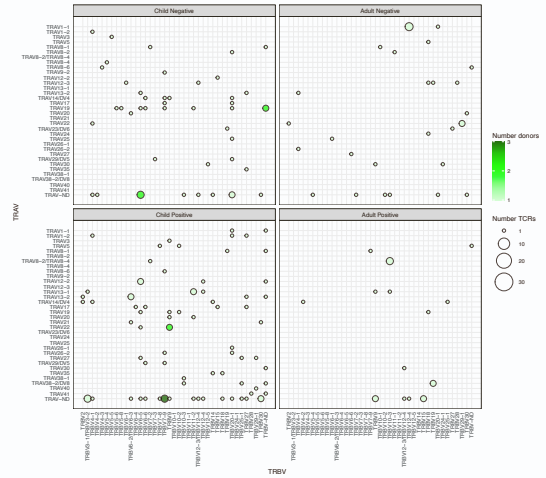

### A2/S<sub>269</sub>

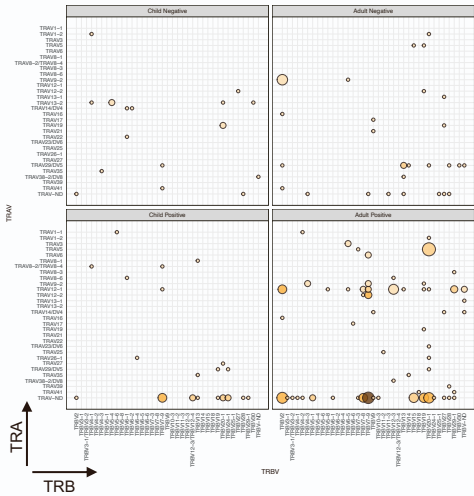

### A24/S<sub>1208</sub>

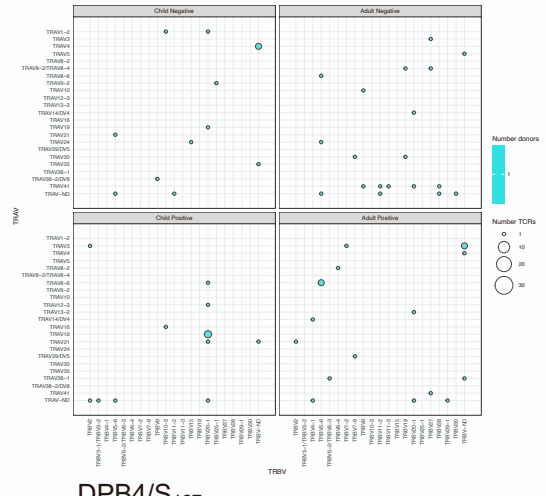

### A2/S<sub>269</sub>

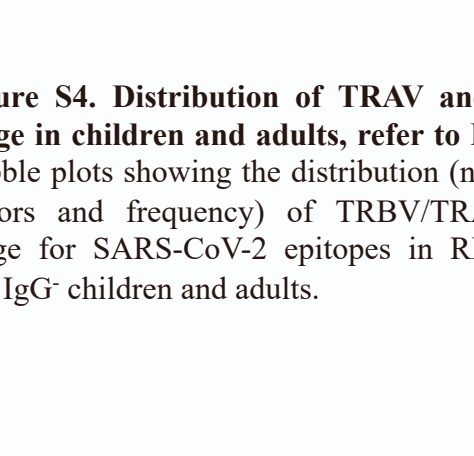

### DPB4/S<sub>167</sub>

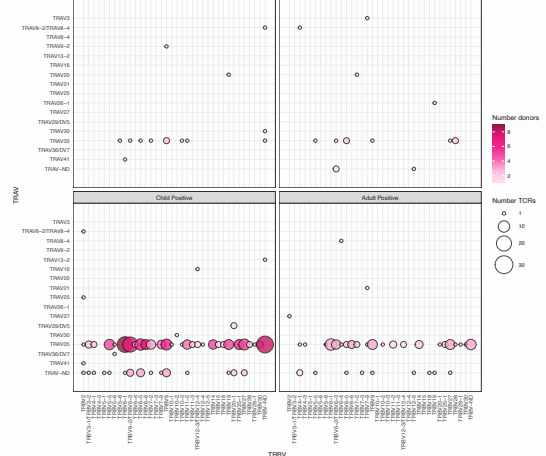

**Figure S4. Distribution of TRAV and TRBV usage in children and adults, refer to Figure 5.** Bubble plots showing the distribution (number of donors and frequency) of TRBV/TRAV gene usage for SARS-CoV-2 epitopes in RBD IgG<sup>+</sup> and IgG<sup>-</sup> children and adults.

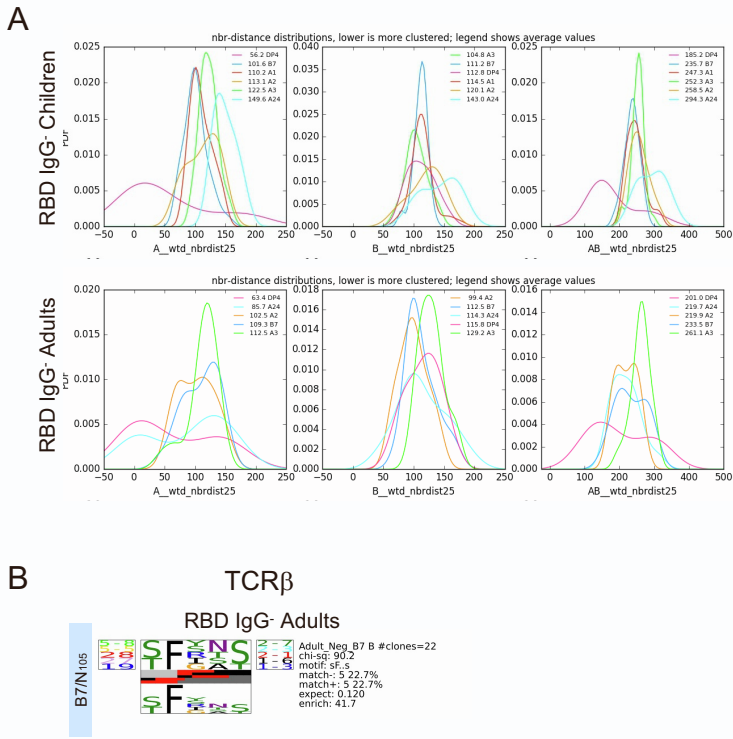

**Figure S5. Similar distribution and probability of generation for SARS-CoV-2-specific TCR $\alpha\beta$  repertoires between RBD IgG<sup>-</sup> children and adults, refer to Figure 6.** (A) Epitope-specific populations from RBD IgG<sup>-</sup> children and adults were quantified for defining features using a neighbour distance distribution. The lower distribution peak indicates a more clustered epitope-specific TCRab repertoire; average distance values for each epitope are depicted within the plot. Analyses for both single and paired chains are shown, as indicated in the plot labels. PDF, probability density function. (B) TCR logo representations of CDR3a and b sequence motif for RBD IgG<sup>-</sup> adults. The motif scores were determined by chi-squared, with values greater than 90 considered highly significant.

## Supplementary Tables

**Table S1.** Cohort demographics, refer to Figure 1.

| Cohort | Participant | Age (years) | Sex | RBD IgG ELISA | Symptomatic | Ct value*    | Days post infection | HLA-A     | HLA-A     | HLA-B | HLA-B  | HLA-DPB1 | HLA-DPB1 |
|--------|-------------|-------------|-----|---------------|-------------|--------------|---------------------|-----------|-----------|-------|--------|----------|----------|
| MEL    | 9.2         | 40          | F   | -             | -           | -            | 28                  | 02:01     | 11:02     | 07:02 | 27:04  | 03:01    | 05:01    |
| MEL    | 9.3         | 3           | M   | -             | +           | e-Gene 32.44 | 30                  | 02:05     | 11:02     | 27:04 | 58:01  | 05:01    | 104:01   |
| MEL    | 18.2        | 44          | F   | -             | -           | -            | 38                  | 02:01/614 | 68:01/164 | 40:01 | 49:01  | 04:01    | 104:01   |
| MEL    | 18.3        | 7           | M   | -             | +           | e-Gene 40    | 40                  | 01:01     | 02:01     | 49:01 | 50:01  | 04:01    | 104:01   |
| MEL    | 21.2        | 29          | F   | -             | +           | -            | 30                  | 02:01     | 25:01     | 07:02 | 18:01  | 04:01    |          |
| MEL    | 21.3        | 2           | F   | -             | +           | Inconclusive | 31                  | 03:01     | 25:01     | 18:01 | 50:01  | 04:01    | 04:02    |
| MEL    | 25.2        | 47          | F   | -             | -           | -            | 45                  | 02:01     | 11:01     | 07:02 | 44:02  | 01:01    | 15:01    |
| MEL    | 25.4        | 10          | F   | -             | +           | Inconclusive | 48                  | 01:01     | 11:01     | 07:02 | 35:02  | 02:01    | 15:01    |
| MEL    | 28.2        | 40          | F   | -             | +           | -            | 44                  | 02:06     | 24:02     | 51:01 | 52NEW^ | 05:01    |          |
| MEL    | 28.3        | 5           | M   | -             | +           | Inconclusive | 48                  | 02:06     | 30:01     | 07:02 | 51:01  | 04:01    | 05:01    |
| MEL    | 34.2        | 46          | F   | -             | -           | -            | 37                  | 01:01     | 02:01     | 51:01 | 57:01  | 04:01    | 104:01   |
| MEL    | 34.3        | 1           | M   | -             | +           | e-Gene 29.43 | 40                  | 01:01     | 02:01     | 14:02 | 51:01  | 04:01    | 13:01    |
| MEL    | 36.2        | 33          | F   | -             | -           | -            | 49                  | 03:01     | 25:01     | 08:01 | 38:01  | 02:01    | 04:02    |
| MEL    | 36.5        | 2           | F   | -             | +           | e-Gene 32.94 | 49                  | 01:01     | 03:01     | 08:01 | 40:01  | 01:01    | 04:02    |
| MEL    | 43.2        | 28          | F   | -             | +           | -            | 36                  | 11:01     | 29:01     | 07:05 | 51:01  | 04:01    | 11:01    |
| MEL    | 43.3        | 1           | M   | -             | +           | e-Gene 34.98 | 35                  | 02:01     | 29:01     | 07:05 | 13:02  | 03:01    | 04:01    |
| MEL    | 46.2        | 33          | F   | +             | +           | e-Gene 12.81 | 42                  | 01:03     | 02:05     | 07:02 | 37:01  | 02:01    | 104:01   |
| MEL    | 46.3        | 4           | M   | +             | +           | e-Gene 13.65 | 42                  | 02:05     | 03:01     | 07:02 | 37:01  | 02:01    | 104:01   |
| MEL    | 46.4        | 2           | F   | +             | +           | e-Gene 13.23 | 42                  | 01:03     | 03:01     | 07:02 |        | 104:01   |          |
| MEL    | 52.1        | 38          | F   | -             | +           | -            | 51                  | 02:01     |           | 44:02 | 51:01  | 04:01    |          |
| MEL    | 52.3        | 4           | M   | -             | -           | e-Gene 33.25 | 29                  | 02:01     | 32:01     | 07:02 | 44:02  | 04:01    |          |
| MEL    | 52.4        | 1           | F   | -             | +           | Inconclusive | 21                  | 02:01     | 32:01     | 07:02 | 44:02  | 04:01    |          |
| MEL    | 53.1        | 37          | F   | -             | -           | -            | 43                  | 02:01     |           | 15:01 | 39:01  | 03:01    | 04:01    |
| MEL    | 53.4        | 0.33        | M   | -             | +           | e-Gene 36    | 56                  | 01:01     | 02:01     | 15:01 | 51:01  | 03:01    |          |
| MEL    | 55.2        | 36          | F   | -             | -           | -            | 28                  | 02:01     | 30:01     | 13:02 | 18:01  | 04:02    | 05:01    |
| MEL    | 55.4        | 4           | F   | -             | -           | e-Gene 31.95 | 31                  | 01:01     | 30:01     | 07:02 | 13:02  | 04:01    | 04:02    |
| MEL    | 57.2        | 48          | F   | -             | -           | -            | 27                  | 02:01     | 24:02     | 18:01 | 27:05  | 04:01    | 04:02    |
| MEL    | 57.3        | 9           | M   | -             | +           | e-Gene 28.73 | 29                  | 02:01     |           | 27:05 | 44:02  | 02:01    | 04:02    |
| MEL    | 58.1        | 32          | F   | -             | +           | -            | 52                  | 03:01     | 30:04     | 14:02 |        | 04:01    | 30:01    |
| MEL    | 58.2        | 11          | M   | +             | +           | e-Gene 24.11 | 52                  | 03:01     | 30:04     | 07:02 | 14:02  | 04:01    |          |
| MEL    | 58.3        | 6           | M   | +             | -           | e-Gene 24.25 | 52                  | 03:01     |           | 07:02 | 14:02  | 04:01    | 30:01    |
| MEL    | 61.3        | 46          | F   | +             | +           | -            | 59                  | 24:02     | 24:10     | 35:30 | 40:01  | 01:01    | 13:01    |
| MEL    | 61.5        | 17          | M   | +             | -           | e-Gene 25.45 | 47                  | 24:02     | 24:33     | 40:01 | 51:06  | 01:01    |          |
| MEL    | 75.2        | 35          | F   | -             | +           | -            | 49                  | 02:01     | 29:02     | 44:02 | 44:03  | 04:01    |          |
| MEL    | 75.3        | 3           | F   | -             | +           | e-Gene 27.37 | 50                  | 01:01     | 29:02     | 37:01 | 44:03  | 04:01    |          |
| MEL    | 78.1        | 34          | F   | +             | +           | -            | 43                  | 01:01     | 02:01     | 07:02 | 55:01  | 04:01    |          |



|     |        |       |   |   |    |                                      |     |       |       |       |       |       |           |
|-----|--------|-------|---|---|----|--------------------------------------|-----|-------|-------|-------|-------|-------|-----------|
| MEL | 78.3   | 3     | M | + | +  | -                                    | 43  | 01:01 | 02:01 | 07:02 | 08:01 | 04:01 |           |
| MEL | 78.4   | 0.33  | F | + | +  | -                                    | 43  | 01:01 | 02:01 | 07:02 | 08:01 | 04:01 |           |
| MEL | 80.1   | 42    | F | - | -  | -                                    | 29  | 02:01 | 24:02 | 07:02 |       | 04:01 | 06:01     |
| MEL | 80.3   | 6     | F | + | -  | -                                    | 29  | 24:02 |       | 07:02 | 27:04 | 04:01 | 06:01     |
| MEL | 80.4   | 8     | F | - | -  | -                                    | 29  | 24:02 |       | 07:02 | 27:04 | 04:01 | 06:01     |
| MEL | 80.5   | 3     | M | + | +  | e-Gene 33.77                         | 31  | 02:01 | 30:02 | 07:02 | 18:01 | 02:02 | 04:01     |
| MEL | 84.1   | 48    | F | + | -  | -                                    | 95  | 02:03 | 11:01 | 38:02 | 39:05 | 02:02 | 296:01    |
| MEL | 84.3   | 3     | M | - | -  | e-Gene 31.22                         | 96  | 11:01 | 32:01 | 28:02 | 44:02 | 04:01 | 296:01    |
| MEL | 84.4   | 6     | M | - | -  | -                                    | 95  | 02:03 | 24:02 | 07:02 | 39:05 | 02:01 | 02:02     |
| MEL | 88.1   | 35    | F | + | +  | -                                    | 100 | 02:01 | 26:01 | 35:08 | 38:01 | 04:01 |           |
| MEL | 88.2   | 2     | M | + | +  | e-Gene 32.84                         | 71  | 01:01 | 26:01 | 35:01 | 38:01 | 02:01 | 04:01     |
| MEL | 94.1   | 36    | F | + | +  | -                                    | 180 | 02:01 | 32:01 | 15:01 | 51:01 | 04:01 | 11:01     |
| MEL | 94.3   | 4     | M | + | +  | -                                    | 180 | 01:01 | 02:01 | 08:01 | 15:01 | 02:01 | 11:01     |
| MEL | 94.4   | 2     | M | + | +  | -                                    | 180 | 01:01 | 32:01 | 08:01 | 15:01 | 02:01 | 11:01     |
| MEL | 97.1   | 38    | F | + | ND | -                                    | 35  | 02:01 | 03:01 | 07:02 | 57:01 | 02:01 | 26:01     |
| MEL | 97.3   | 2     | F | + | +  | -                                    | 35  | 03:01 | 11:01 | 52:01 | 57:01 | 02:01 |           |
| MEL | 102.2  | 34    | F | + | ND | -                                    | 36  | 01:01 | 26:01 | 08:01 | 38:01 | 02:01 | 09:01     |
| MEL | 102.3  | 13    | M | + | +  | E: 37.82, RDRP/S:<br>N/A, N: 38.97   | 33  | 02:06 | 29:02 | 40:06 | 58:01 | 02:01 | 3:01      |
| MEL | 102.4  | 1     | M | + | +  | E: 14.36, RDRP/S:<br>15.67, N: 16.98 | 33  | 01:01 |       | 08:01 | 15:01 | 02:01 | 09:01     |
| MEL | 104.4  | 9     | F | + | +  | E: 20.08, RDRP/S:<br>21.50, N: 22.16 | 37  | 03:01 | 32:01 | 35:02 | 41:01 | 04:02 | 104:01:00 |
| MEL | 104.5  | 7     | F | + | +  | -                                    | 44  | 29:01 |       | 07:05 |       | 04:02 |           |
| MEL | 104.6  | 5     | M | + | +  | E: 26.96, RDRP/S:<br>29.21, N: 29.85 | 37  | 29:01 |       | 07:05 |       | 04:02 |           |
| MEL | 104.7  | 3     | F | + | ND | -                                    | 43  | 03:01 | 29:01 | 07:05 | 35:02 | 04:02 |           |
| LA  | HT1M6  | 4.36  | F | + | +  | N1 18.3, N2 20.8                     | 92  | 02:01 | 11:01 | 35:01 | 38:01 | 04:01 |           |
| LA  | HT34M5 | 3.93  | M | + | -  | N1 16.868, N2 17.882                 | 168 | 30:01 | 32:01 | 15:01 | 52:01 | 04:01 | 04:02     |
| LA  | HT36M4 | 10.89 | F | + | -  | N1 32.8, N2 35.7                     | 65  | 30:02 | 68:01 | 14:02 | 51:01 | 02:01 | 14:01     |
| LA  | HT47M1 | 5.02  | M | + | +  | N1 36, N2 36.4                       | 88  | 02:01 | 03:01 | 07:02 | 18:01 | 04:01 | 105:01    |
| LA  | HT50M1 | 5.52  | M | + | -  | -                                    | 91  | 01:01 | 02:01 | 18:01 | 51:01 | 04:01 |           |
| LA  | HT51M1 | 8.24  | M | + | -  | Inconclusive                         | 77  | 24:02 | 68:01 | 35:12 | 39:11 | 04:02 | 14:01     |
| LA  | HT56M3 | 9.88  | F | + | -  | N1 31.3, N2 32.3                     | 73  |       |       |       |       |       |           |
| LA  | HT56M4 | 8.47  | M | + | -  | N1 31.7, N2 32.9                     | 73  | 02:05 | 23:01 | 15:03 | 50:01 | 04:01 | 11:01     |
| LA  | HT59M1 | 1.27  | F | + | +  | N1 33.4, N2 35.4                     | 129 | 02:01 | 68:03 | 07:02 | 39:05 | 04:01 | 04:02     |
| LA  | HT60M1 | 9.07  | M | + | -  | Undetected                           | 50  | 01:01 | 02:06 | 07:02 | 15:30 | 02:01 | 04:02     |
| LA  | HT62M1 | 13.5  | M | + | -  | N1 34.1, N2 36.3                     | 123 | 02:01 | 02:06 | 35:12 | 35:17 | 04:01 | 04:02     |
| LA  | HT64M1 | 5.59  | F | + | +  | Inconclusive                         | 55  | 02:01 | 24:02 | 35:17 | 35:43 | 04:02 | 05:01     |
| LA  | HT66M5 | 4.21  | M | + | -  | N1 32.4, N2 35.9                     | 73  | 03:01 | 11:01 | 39:01 | 44:02 | 03:01 | 04:02     |
| LA  | HT66M6 | 5.2   | F | + | -  | Undetected                           | 82  | 02:01 | 68:03 | 35:01 | 39:01 | 04:01 | 04:02     |
| LA  | HT75M1 | 1.82  | M | + | +  | N1 24.6, N2 25                       | 68  | 02:11 | 11:01 | 38:02 | 40:01 | 01:01 | 05:01     |
| LA  | HT83M1 | 6.98  | F | + | -  | Not tested                           | 77  | 11:01 | 24:02 | 40:02 | 55:01 | 04:01 | 04:02     |

|     |        |      |   |   |   |                      |     |       |       |       |       |        |         |
|-----|--------|------|---|---|---|----------------------|-----|-------|-------|-------|-------|--------|---------|
| LA  | HT93M1 | 6.09 | F | + | + | N1 27.053, N2 28.464 | 132 | 29:02 | 32:01 | 18:01 | 44:03 | 04:01  | 131:01  |
| MEL | CA01   | 25   | M | + | + | NA                   | 60  | 01:01 | 02:03 | 37:01 | 52:01 | 02:01  | 15:01   |
| MEL | CA09   | 30   | F | + | + | NA                   | 67  | 02:01 | 23:01 | 49:01 | 49:01 | 702:01 | 14:01   |
| MEL | CA12   | 23   | M | + | + | NA                   | 67  | 02:01 | 29:02 | 57:03 | 58:01 | 04:01  |         |
| MEL | CA16C1 | 30   | F | + | + | NA                   | 83  | 01:01 | 24:02 | 07:02 | 08:01 | 04:01  |         |
| MEL | CA17   | 49   | F | + | + | NA                   | 62  | 01:01 | 11:01 | 07:02 | 40:01 | 02:01  | 03:01   |
| MEL | CA19   | 58   | F | + | + | NA                   | 53  | 02:01 |       | 07:02 | 15:01 | 04:02  | 04:02   |
| MEL | CA21   | 32   | F | + | + | NA                   | 72  | 01:01 | 24:02 | 44:02 | 44:02 | 04:01  | 20:01   |
| MEL | CA22   | 83   | F | + | + | NA                   | 75  | 24:02 | 33:01 | 14:02 | 55:01 | 04:01  | 05:01   |
| MEL | CA23   | 83   | F | + | + | NA                   | 72  | 11:01 | 24:02 | 18:01 | 51:01 | 04:01  |         |
| MEL | CA27   | 58   | F | + | + | NA                   | 61  | 02:01 | 24:07 | 15:35 | 40:01 | 05:01  | 13:FNVU |
| MEL | CA29   | 25   | F | + | + | NA                   | 71  | 11:01 | 33:03 | 40:01 | 48:01 | 03:01  | 05:01   |
| MEL | CA30   | 91   | F | + | - | NA                   | 66  | 24:02 | 26:01 | 15:01 | 38:01 | 02:01  | 04:01   |
| MEL | CA33   | 28   | F | + | + | NA                   | 76  | 02:01 |       | 40:02 | 44:03 | 02:01  | 04:01   |
| MEL | CA34C1 | 38   | M | + | + | NA                   | 73  | 03:01 | 24:02 | 07:02 | 52:01 | 03:01  | 04:01   |
| MEL | CA35   | 26   | F | + | + | NA                   | 76  | 01:01 | 31:01 | 08:01 | 27:05 | 03:01  | 04:02   |
| MEL | CA37C1 | 56   | M | + | + | NA                   | 54  | 02:01 | 26:01 | 44:02 | 47:01 | 02:01  | 05:01   |
| MEL | CA38   | 54   | F | + | + | NA                   | 52  | 02:01 | 03:01 | 15:01 | 40:01 | 02:01  | 04:01   |
| MEL | CA39   | 30   | F | + | + | NA                   | 81  | 01:01 | 02:01 | 08:01 | 27:05 | 04:01  | 04:02   |
| MEL | CA46   | 27   | M | + | + | NA                   | 81  | 24:02 |       | 18:01 | 44:03 | 04:02  | 11:01   |
| MEL | CA48   | 32   | F | + | + | NA                   | 84  | 02:01 | 29:02 | 14:01 | 37:01 | 04:01  | 11:01   |
| MEL | CA52   | 27   | F | + | - | NA                   | 86  | 02:01 | 26:01 | 27:05 | 35:03 | 04:01  |         |
| MEL | CA52C1 | 37   | M | + | + | NA                   | 87  | 02:06 | 33:03 | 07:02 | 44:03 | 02:01  | 04:01   |
| MEL | CA56   | 37   | M | + | + | NA                   | 69  | 01:01 | 02:01 | 35:03 | 40:01 | 02:01  | 04:02   |
| MEL | CA61   | 43   | F | + | + | NA                   | 82  | 01:01 | 24:02 | 07:02 | 57:01 | 02:01  | 04:01   |

\*Ct values were not available for some PCR-positive adults (NA) and were not obtained for PCR-negative adults or children (-).

^The new allele differs from 52:01:01:01 at codon 81 in exon 2 (GCG->GCT) resulting in no amino acid change.

ND, Not determined; NA, Not available.
